# Supplementary material for: SARS-CoV-2 Vaccine Alpha and Delta Variant Breakthrough Infections Are Rare and Mild but Can Happen Relatively Early after Vaccination
Source: MDPI journal article supplement (doi:10.3390/microorganisms10050857), 2022-04-21
Supplement: s1 [file s1]

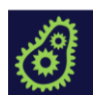

Supplementary materials

**Table S1. Collected vaccine recipient and patient characteristics.** \* other reasons than age, healthcare worker, chronic disease, contact with vulnerable person, living in a community with increased risks. \* general previous side effects.

| Control group 1                                        | Control group 2                                            | Breakthrough infections                                     |
|--------------------------------------------------------|------------------------------------------------------------|-------------------------------------------------------------|
| Age                                                    |                                                            | Age                                                         |
| Gender, (male/female), count & percentage              | Gender, (male/female), count & percentage                  | Gender, (male/female), count & percentage                   |
| Type of vaccine; categorical, Pfizer/BioNTech, Moderna | Type of vaccine; categorical, Pfizer/BioNTech, Moderna     | Type of vaccine; categorical, Pfizer/BioNTech, Moderna      |
| Chronic disease, (Yes/No)                              | Chronic disease, (Yes/No)                                  | Chronic disease, (Yes/No)                                   |
| Healthcare worker, (Yes/No)                            | Healthcare worker, (Yes/No)                                | Healthcare worker, (Yes/No)                                 |
| Close contact to high-risk person, (Yes/No)            | Close contact to high-risk person, (Yes/No)                | Close contact to high-risk person, (Yes/No)                 |
| Vaccination for other reasons*, (Yes/No)               | N/A                                                        |                                                             |
| Pregnancy, (Yes/No)                                    | Pregnancy, (Yes/No)                                        | Pregnancy, (Yes/No)                                         |
| Person recovered from COVID-19, (Yes/No)               | Person recovered from COVID-19, (Yes/No)                   | Person recovered from COVID-19, (Yes/No)                    |
| Date of full vaccination                               | Date of full vaccination                                   | Date of full vaccination                                    |
| N/A                                                    | Severe immunosuppression, (Yes/No)                         | Severe immunosuppression, (Yes/No)                          |
| N/A                                                    | Serious previous side effects*, (Yes/No)                   | Serious side effects, (Yes/No)                              |
| N/A                                                    | Acute fever before / during COVID-19 vaccination, (Yes/No) | Acute fever before / during COVID-19 vaccination, (Yes/No)  |
| N/A                                                    | N/A                                                        | Time between considered fully vaccinated and positive test  |
| N/A                                                    | N/A                                                        | Time between considered fully vaccinated and first symptoms |
| N/A                                                    | N/A                                                        | SARS-CoV-2 variant, (Alpha or Delta), count & percent       |
| N/A                                                    | N/A                                                        | Hospitalisation, (Yes/No)                                   |

|     |     |                                                                                                                                                                             |
|-----|-----|-----------------------------------------------------------------------------------------------------------------------------------------------------------------------------|
| N/A | N/A | Suspected source of infection: club, party, bar; cultural event; family; friends; holidays; hospital; religion; retirement and nursing home; school; sports; work; unknown; |
| N/A | N/A | Chronic lung disease, (Yes/No)                                                                                                                                              |
| N/A | N/A | Chronic renal disease, (Yes/No)                                                                                                                                             |
| N/A | N/A | Cancer, (Yes/No)                                                                                                                                                            |
| N/A | N/A | Cardiovascular disease, (Yes/No)                                                                                                                                            |
| N/A | N/A | Arterial hypertension, (Yes/No)                                                                                                                                             |
| N/A | N/A | Diabetes, (Yes/No)                                                                                                                                                          |
| N/A | N/A | Obesity, (Yes/No)                                                                                                                                                           |

**Table S2.** Accession numbers of used genomes in this analysis.

| GISAID Identifier | Pangolin Lineage |
|-------------------|------------------|
| EPI_ISL_3086290   | AY.4             |
| EPI_ISL_4903597   | AY.4             |
| EPI_ISL_4903635   | AY.102           |
| EPI_ISL_5049804   | AY.102           |
| EPI_ISL_5307606   | AY.46            |
| EPI_ISL_5307608   | AY.43            |
| EPI_ISL_5307610   | AY.54            |
| EPI_ISL_5307620   | AY.43            |
| EPI_ISL_5307622   | AY.14            |
| EPI_ISL_5307667   | AY.46            |
| EPI_ISL_5307709   | AY.102           |
| EPI_ISL_5428846   | AY.4             |
| EPI_ISL_5428847   | AY.41            |
| EPI_ISL_5428848   | AY.4             |
| EPI_ISL_5428849   | AY.46.6          |
| EPI_ISL_5428850   | AY.111           |
| EPI_ISL_5508919   | AY.43            |
| EPI_ISL_5508977   | AY.98.1          |

---

|                 |           |
|-----------------|-----------|
| EPI_ISL_5508986 | AY.98.1   |
| EPI_ISL_5508994 | AY.43     |
| EPI_ISL_5509063 | AY.80     |
| EPI_ISL_5509099 | AY.47     |
| EPI_ISL_5509125 | AY.33     |
| EPI_ISL_5509131 | AY.33     |
| EPI_ISL_5509160 | AY.43     |
| EPI_ISL_5509166 | AY.4      |
| EPI_ISL_5765992 | AY.43     |
| EPI_ISL_5766012 | AY.95     |
| EPI_ISL_5766062 | AY.43     |
| EPI_ISL_5766070 | AY.43     |
| EPI_ISL_5766077 | AY.43     |
| EPI_ISL_5766144 | AY.43     |
| EPI_ISL_5766182 | B.1.617.2 |
| EPI_ISL_5766183 | AY.20     |
| EPI_ISL_5766195 | B.1.617.2 |
| EPI_ISL_5766203 | AY.43     |
| EPI_ISL_5766208 | AY.43     |
| EPI_ISL_5766269 | AY.46.6   |
| EPI_ISL_5841634 | AY.44     |
| EPI_ISL_5841635 | AY.54     |
| EPI_ISL_5841657 | AY.4      |
| EPI_ISL_5841661 | AY.102    |
| EPI_ISL_5841666 | AY.43     |
| EPI_ISL_5841685 | AY.4      |
| EPI_ISL_5841691 | AY.102    |
| EPI_ISL_5841709 | AY.9.2    |
| EPI_ISL_5933964 | AY.102    |
| EPI_ISL_5933970 | AY.102    |
| EPI_ISL_5934004 | AY.4      |
| EPI_ISL_5934005 | AY.102    |

---

---

|                 |           |
|-----------------|-----------|
| EPI_ISL_5934006 | AY.43     |
| EPI_ISL_5934007 | AY.43     |
| EPI_ISL_5934008 | AY.4      |
| EPI_ISL_5934009 | AY.102    |
| EPI_ISL_5934010 | AY.46.6   |
| EPI_ISL_6015872 | AY.44     |
| EPI_ISL_6015873 | AY.43     |
| EPI_ISL_6015874 | AY.43     |
| EPI_ISL_6015875 | AY.43     |
| EPI_ISL_6157569 | AY.54     |
| EPI_ISL_6157570 | AY.102    |
| EPI_ISL_3086299 | AY.70     |
| EPI_ISL_5841659 | AY.43     |
| EPI_ISL_1747622 | B.1.1.7   |
| EPI_ISL_1747636 | B.1.1.7   |
| EPI_ISL_1747641 | B.1.1.7   |
| EPI_ISL_1748263 | B.1.1.7   |
| EPI_ISL_1748463 | B.1.1.7   |
| EPI_ISL_1914607 | B.1.1.7   |
| EPI_ISL_2270095 | B.1.1.7   |
| EPI_ISL_2466583 | B.1.1.7   |
| EPI_ISL_3030104 | AY.98.1   |
| EPI_ISL_3030113 | AY.43     |
| EPI_ISL_3086318 | AY.42     |
| EPI_ISL_3086319 | B.1.617.2 |
| EPI_ISL_3184351 | AY.43     |
| EPI_ISL_3184366 | AY.9.2    |
| EPI_ISL_3229188 | B.1.1.7   |
| EPI_ISL_3229190 | AY.43     |
| EPI_ISL_3229201 | AY.43     |
| EPI_ISL_3229213 | B.1.617.2 |
| EPI_ISL_3229214 | B.1.617.2 |

---

---

|                 |           |
|-----------------|-----------|
| EPI_ISL_3229224 | AY.5      |
| EPI_ISL_3229225 | AY.43     |
| EPI_ISL_3229227 | AY.43     |
| EPI_ISL_3229248 | AY.4      |
| EPI_ISL_3247301 | AY.43     |
| EPI_ISL_3247308 | AY.42     |
| EPI_ISL_3247349 | AY.98.1   |
| EPI_ISL_3303743 | AY.43     |
| EPI_ISL_3303758 | AY.42     |
| EPI_ISL_3344075 | AY.42     |
| EPI_ISL_3344101 | AY.4      |
| EPI_ISL_3344102 | AY.43     |
| EPI_ISL_3344111 | B.1.617.2 |
| EPI_ISL_3425805 | AY.98.1   |
| EPI_ISL_3425806 | AY.34     |
| EPI_ISL_3451674 | AY.43     |
| EPI_ISL_3451732 | AY.43     |
| EPI_ISL_3451733 | AY.43     |
| EPI_ISL_3530135 | AY.42     |
| EPI_ISL_3530171 | AY.94     |
| EPI_ISL_3530179 | AY.23     |
| EPI_ISL_3530776 | AY.43     |
| EPI_ISL_3530792 | AY.98.1   |
| EPI_ISL_3530842 | AY.34     |
| EPI_ISL_3570114 | AY.16     |
| EPI_ISL_3570115 | B.1.617.2 |
| EPI_ISL_3570127 | AY.43     |
| EPI_ISL_3570128 | B.1.617.2 |
| EPI_ISL_3570130 | AY.43     |
| EPI_ISL_3710254 | AY.4      |
| EPI_ISL_3710255 | AY.98.1   |
| EPI_ISL_3730669 | AZ.2      |

---

---

|                 |           |
|-----------------|-----------|
| EPI_ISL_3730670 | AY.36     |
| EPI_ISL_3824224 | AY.42     |
| EPI_ISL_3824225 | AY.4      |
| EPI_ISL_3824226 | AY.98.1   |
| EPI_ISL_3824227 | AZ.2      |
| EPI_ISL_3824228 | AY.43     |
| EPI_ISL_3824229 | AY.43     |
| EPI_ISL_3824230 | AY.102    |
| EPI_ISL_3824270 | AY.12     |
| EPI_ISL_4251188 | AY.43     |
| EPI_ISL_4251192 | AY.43     |
| EPI_ISL_4251219 | AY.43     |
| EPI_ISL_4392868 | AY.43     |
| EPI_ISL_4395046 | AY.9.1    |
| EPI_ISL_4395061 | AY.43     |
| EPI_ISL_4395072 | AY.4      |
| EPI_ISL_4395085 | AY.104    |
| EPI_ISL_4395102 | AY.86     |
| EPI_ISL_4395109 | AY.43     |
| EPI_ISL_4395150 | AY.33     |
| EPI_ISL_4395151 | AY.9.2    |
| EPI_ISL_4395152 | AY.102    |
| EPI_ISL_4395153 | AY.9.2    |
| EPI_ISL_4395154 | AY.43     |
| EPI_ISL_4395155 | AY.42     |
| EPI_ISL_4395156 | AY.98.1   |
| EPI_ISL_4395157 | AY.4      |
| EPI_ISL_4395158 | AY.43     |
| EPI_ISL_4395159 | AY.4      |
| EPI_ISL_4395160 | B.1.617.2 |
| EPI_ISL_4395161 | B.1.617.2 |
| EPI_ISL_4395162 | B.1.617.2 |

---

---

|                 |           |
|-----------------|-----------|
| EPI_ISL_4395163 | AY.9.2    |
| EPI_ISL_4395165 | AY.9.2    |
| EPI_ISL_4395166 | AY.43     |
| EPI_ISL_4395167 | AY.9.2    |
| EPI_ISL_4395168 | AY.43     |
| EPI_ISL_4395169 | AY.46     |
| EPI_ISL_4395170 | AY.9.2    |
| EPI_ISL_4395173 | AY.9.2    |
| EPI_ISL_4395288 | AY.5      |
| EPI_ISL_4395290 | AY.5.4    |
| EPI_ISL_4395301 | AY.73     |
| EPI_ISL_4395303 | AY.43     |
| EPI_ISL_4395308 | AY.25     |
| EPI_ISL_4410796 | AY.43     |
| EPI_ISL_4410804 | AY.9.2    |
| EPI_ISL_4410806 | AY.4      |
| EPI_ISL_4410862 | AY.42     |
| EPI_ISL_4410869 | AY.46.6   |
| EPI_ISL_4410890 | AY.4      |
| EPI_ISL_4450796 | AY.102    |
| EPI_ISL_4450798 | B.1.617.2 |
| EPI_ISL_4450800 | AY.43     |
| EPI_ISL_4450829 | AY.42     |
| EPI_ISL_4450830 | AY.9.2    |
| EPI_ISL_4450831 | AY.9.2    |
| EPI_ISL_4450832 | B.1.617.2 |
| EPI_ISL_4450833 | AY.4      |
| EPI_ISL_4450834 | AY.4      |
| EPI_ISL_4450835 | AY.43     |
| EPI_ISL_4450836 | AY.98.1   |
| EPI_ISL_4450837 | AY.46.6   |
| EPI_ISL_4450838 | AY.46.6   |

---

---

|                 |           |
|-----------------|-----------|
| EPI_ISL_4450839 | AY.43     |
| EPI_ISL_4450840 | AY.9.2    |
| EPI_ISL_4450841 | AY.98.1   |
| EPI_ISL_4450888 | AY.42     |
| EPI_ISL_4450889 | AY.43     |
| EPI_ISL_4450892 | AY.33     |
| EPI_ISL_4450897 | AY.43     |
| EPI_ISL_4450901 | AY.43     |
| EPI_ISL_4450904 | AY.43     |
| EPI_ISL_4542104 | AY.25     |
| EPI_ISL_4542107 | AY.39     |
| EPI_ISL_4542117 | AY.23     |
| EPI_ISL_4542185 | AY.43     |
| EPI_ISL_4571409 | B.1.617.2 |
| EPI_ISL_4571425 | AY.43     |
| EPI_ISL_4814044 | B.1.617.2 |
| EPI_ISL_4814050 | AY.102    |
| EPI_ISL_4814097 | AY.43     |
| EPI_ISL_4814115 | AY.43     |
| EPI_ISL_4903661 | AY.102    |
| EPI_ISL_4903668 | AY.43     |
| EPI_ISL_5307621 | B.1.617.2 |
| EPI_ISL_5307655 | AY.43     |
| EPI_ISL_5307682 | B.1.617.2 |
| EPI_ISL_5307686 | AY.4.3    |
| EPI_ISL_5307719 | AY.43     |
| EPI_ISL_5307727 | AY.111    |
| EPI_ISL_5307728 | AY.46     |
| EPI_ISL_5307730 | AY.43     |
| EPI_ISL_5509155 | AY.43     |
| EPI_ISL_5766178 | AY.44     |
| EPI_ISL_6307802 | AY.4      |

---



|                 |           |
|-----------------|-----------|
| EPI_ISL_6307803 | B.1.617.2 |
| EPI_ISL_6307804 | AY.25     |
| EPI_ISL_6307805 | AY.102    |
| EPI_ISL_6307806 | AY.102    |
| EPI_ISL_6307807 | AY.43     |
| EPI_ISL_6307808 | AY.4      |
| EPI_ISL_6307809 | AY.42     |
| EPI_ISL_6307810 | AY.43     |
| EPI_ISL_6307811 | AY.25     |
| EPI_ISL_6307812 | AY.102    |
| EPI_ISL_6307813 | AY.102    |

**Table S3.** Baseline characteristics for all individuals in the database with a confirmed breakthrough infection.

| Variable                                                                                                    | Level                      | Overall                    | % missing |
|-------------------------------------------------------------------------------------------------------------|----------------------------|----------------------------|-----------|
| n                                                                                                           |                            | 488                        |           |
| Gender (%)                                                                                                  | Male<br>Female             | 231 (47.3%)<br>257 (52.7%) | 0         |
| Age, median (IQR) in years                                                                                  |                            | 44.5 (32.00-64.00)         | 0         |
| Vaccine type, n (%)                                                                                         | Moderna<br>Pfizer/BioNTech | 257 (52.2%)<br>231 (47.0%) | 0         |
| Time full vaccine to 1st symptom, median (IQR)                                                              |                            | 78 (47-122)                | 7.6       |
| Time full vaccine/Delta outbreak to 1st symptoms, median (IQR)                                              |                            | 50 (29-72)                 | 49.0      |
| Time full vaccine to 1st symptoms for Alpha & Delta patients vaccinated after Delta outbreak, median (IQR)  |                            | 42 (24.75-58.75)           | 84        |
| Time full vaccine to positive test, median (IQR)                                                            |                            | 78 (47-123.5)              | 0.2       |
| Time full vaccine/Delta outbreak to positive test, median (IQR)                                             |                            | 50 (30-72)                 | 45.3      |
| Time full vaccine to positive test for Alpha & Delta patients vaccinated after Delta outbreak, median (IQR) |                            | 45 (25-60)                 | 82.2      |
| Indication for vaccine                                                                                      |                            |                            |           |
| Chronic diseases, n (%)                                                                                     | No<br>Yes                  | 332 (68%)<br>156 (32%)     | 0         |

|                                               |                                                                                                                                                                      |                                                                                                                                                           |      |
|-----------------------------------------------|----------------------------------------------------------------------------------------------------------------------------------------------------------------------|-----------------------------------------------------------------------------------------------------------------------------------------------------------|------|
| Healthcare worker, n (%)                      | No<br>Yes                                                                                                                                                            | 429 (87.9%)<br>59 (12.1%)                                                                                                                                 | 0    |
| Close contact to high-risk person, n (%)      | No<br>Yes                                                                                                                                                            | 363 (74.4%)<br>125 (25.6%)                                                                                                                                | 0    |
| Serious side effects to other vaccines, n (%) | No<br>Yes                                                                                                                                                            | 487 (99.8%)<br>1 (0.2%)                                                                                                                                   | 0    |
| Severe immunosuppression, n (%)               | No<br>Yes                                                                                                                                                            | 463 (94.9%)<br>25 (5.1%)                                                                                                                                  | 0    |
| Acute fever, n (%)                            | No<br>Yes                                                                                                                                                            | 488 (100%)<br>0 (0%)                                                                                                                                      | 0    |
| Recovered from COVID-19 (%)                   | No<br>Yes                                                                                                                                                            | 482 (98.8%)<br>6 (1.2%)                                                                                                                                   | 0    |
| Pregnant (%)                                  | No<br>Yes                                                                                                                                                            | 487 (99.8%)<br>1 (0.2%)                                                                                                                                   | 0    |
| PCR based Ct value, median (IQR)              |                                                                                                                                                                      | 20.45 (17.80 -<br>26.23)                                                                                                                                  | 60.2 |
| Clinical severity (%)                         | Asymptomatic<br>Mild illness<br>Moderate illness<br>Severe illness<br>Critical illness<br>and death                                                                  | 26 (5.3%)<br>448 (91.8%)<br>7 (1.4%)<br>5 (1.0%)<br>2 (0.4%)                                                                                              | 0    |
| Hospitalisation (%)                           | No<br>Yes                                                                                                                                                            | 474 (97.1%)<br>14 (2.9%)                                                                                                                                  | 0    |
| Suspected source of infection (%)             | Club, party, bar<br>Cultural event<br>Family<br>Friends<br>Holidays<br>Hospital<br>Religion<br>Retirement and<br>nursing home<br>School<br>Sports<br>Unknown<br>Work | 17 (3.5%)<br>7 (1.4%)<br>134 (21.5%)<br>25 (5.1%)<br>105 (21.5%)<br>7 (1.4%)<br>3 (0.6%)<br>23 (4.7%)<br>9 (1.8%)<br>4 (0.8%)<br>118 (24.2%)<br>36 (7.4%) | 0    |
| Baseline risk factor                          |                                                                                                                                                                      |                                                                                                                                                           |      |
| Chronic lung disease (%)                      | No<br>Yes                                                                                                                                                            | 454 (93%)<br>34 (7%)                                                                                                                                      | 0    |

|                            |           |                           |     |
|----------------------------|-----------|---------------------------|-----|
| Chronic renal disease (%)  | No<br>Yes | 480 (98.4%)<br>8 (1.6%)   | 0   |
| Cancer (%)                 | No<br>Yes | 473 (96.9%)<br>15 (3.1%)  | 0   |
| Cardiovascular disease (%) | No<br>Yes | 448 (91.8%)<br>40 (8.2%)  | 0   |
| Arterial disease (%)       | No<br>Yes | 413 (84.8%)<br>74 (15.2%) | 0.2 |
| Diabetes (%)               | No<br>Yes | 447 (91.6%)<br>41 (8.4%)  | 0   |
| Obesity (%)                | No<br>Yes | 485 (99.4%)<br>3 (0.6%)   | 0   |

**Table S4.** Baseline characteristics of patients with breakthrough infection who showed asymptomatic or mild illness (n=478) compared to patients with moderate, severe and critical illness (n=478).

| Variable                   | Level           | asympto         | mild        | moderate   | severe     | critical/<br>death | %<br>mis<br>s |
|----------------------------|-----------------|-----------------|-------------|------------|------------|--------------------|---------------|
| n                          |                 | 26              | 448         | 7          | 5          | 2                  |               |
| Age, med (IQR)             | Years           | 67 (32.5-82.25) | 43 (42-62)  | 77 (63-81) | 81 (79-87) | 87 (85-89)         | 0             |
| Sex, n (%)                 | Man             | 10 (38.5%)      | 212 (47.3%) | 5 (71.4%)  | 3 (60%)    | 1 (50%)            | 0             |
|                            | Woman           | 16 (61.5%)      | 236 (52.7%) | 2 (28.6%)  | 2 (40%)    | 1 (50%)            |               |
| Type of vaccine, n (%)     | Moderna         | 13 (50%)        | 239 (53.3%) | 4 (57.1%)  | 1 (20%)    | 0 (0%)             | 0             |
|                            | Pfizer/BioNTech | 13 (50%)        | 209 (46.7%) | 3 (42.9%)  | 4 (80%)    | 2 (100%)           |               |
| Variants                   | Alpha           | 2 (25%)         | 7 (2.8%)    | 0 (0%)     | 2 (50%)    | 1 (50%)            | 45.1          |
|                            | Delta           | 6 (75%)         | 242 (97.2%) | 5 (100%)   | 2 (50%)    | 1 (50%)            |               |
| Indication for vaccination |                 |                 |             |            |            |                    |               |
| Chronic diseases, n (%)    | No              | 13 (50%)        | 318 (71%)   | 0 (0%)     | 1 (20%)    | 0 (0%)             | 0             |
|                            | Yes             | 13 (50%)        | 130 (29%)   | 7 (100%)   | 4 (80%)    | 2 (100%)           |               |
| Healthcare worker, n (%)   | No              | 23 (88.5%)      | 392 (87.5%) | 7 (100%)   | 5 (100%)   | 2 (100%)           | 0             |
|                            | Yes             | 3 (11.5%)       | 56 (12.5%)  | 0 (0%)     | 0 (0%)     | 0 (0%)             |               |

|                                                                                       |      |               |                  |                     |                 |               |     |
|---------------------------------------------------------------------------------------|------|---------------|------------------|---------------------|-----------------|---------------|-----|
| Close contact to high-risk person, n (%)                                              | No   | 14 (53.8%)    | 341 (76.1%)      | 5 (71.4%)           | 3 (60%)         | 0 (0%)        | 0   |
|                                                                                       | Yes  | 12 (46.2%)    | 107 (23.9%)      | 2 (28.6%)           | 2 (40%)         | 2 (100%)      |     |
| Serious side effects to other vaccines, n (%)                                         | No   | 26 (100%)     | 447 (99.8%)      | 7 (100%)            | 5 (100%)        | 2 (100%)      | 0   |
|                                                                                       | Yes  | 0 (0%)        | 1 (0.2%)         | 0 (0%)              | 0 (0%)          | 0 (0%)        |     |
| Severe immunosuppression, n (%)                                                       | No   | 24 (92.3%)    | 428 (95.5%)      | 5 (71.4%)           | 4 (80%)         | 2 (100%)      | 0   |
|                                                                                       | Yes  | 2 (7.7%)      | 20 (4.5%)        | 2 (28.6%)           | 1 (20%)         | 0 (0%)        |     |
| Acute fever, n (%)                                                                    | No   | 26 (100%)     | 448 (100%)       | 7 (100%)            | 5 (100%)        | 2 (100%)      | 0   |
|                                                                                       | Yes  | 0 (0%)        | 0 (0%)           | 0 (0%)              | 0 (0%)          | 0 (0%)        |     |
| Pregnant, n (%)                                                                       | No   | 26 (100%)     | 447 (99.8%)      | 7 (100%)            | 5 (100%)        | 2 (100%)      | 0   |
|                                                                                       | Yes  | 0 (0%)        | 1 (0.2%)         | 0 (0%)              | 0 (0%)          | 0 (0%)        |     |
| Recovered from COVID19, n (%)                                                         | No   | 25 (96.2%)    | 443 (98.9%)      | 7 (100%)            | 5 (100%)        | 2 (100%)      | 0   |
|                                                                                       | Yes  | 1 (3.8%)      | 5 (1.1%)         | 0 (0%)              | 0 (0%)          | 0 (0%)        |     |
| Time vacc to 1st symptoms, median (IQR)                                               | days | 148 (148-148) | 77 (47-119)      | 191.5 (109.3-244.5) | 123 (104-167.5) | 122 (122-122) | 7.6 |
| Time vacc/Delta outbreak to 1st symptoms, median (IQR)                                | days | 107 (107-107) | 50 (29-70)       | 106.5 (98.3-108.3)  | 64 (63-65)      | 25 (25-25)    | 49  |
| Time vacc to 1st symptoms for Alpha & Delta patients vaccinated after Delta outbreak, | days | NA            | 42 (24.75-58.75) | NA                  | NA              | NA            | 84  |

|                                                                                                                                |                                |                         |                         |                            |                    |                         |      |
|--------------------------------------------------------------------------------------------------------------------------------|--------------------------------|-------------------------|-------------------------|----------------------------|--------------------|-------------------------|------|
| median<br>(IQR)                                                                                                                |                                |                         |                         |                            |                    |                         |      |
| Time vacc to<br>positive test,<br>median<br>(IQR)                                                                              | days                           | 71.5 (41.25-<br>135.25) | 78 (48-120.5)           | 150 (96.5-<br>242)         | 85 (2-123)         | 62 (32-92)              | 0.2  |
| Time<br>vacc/Delta<br>outbreak to<br>positive test,<br>median<br>(IQR)                                                         | days                           | 36 (20.75-57.5)         | 50 (31.75-72)           | 107 (78-<br>109)           | 32 (2-63.75)       | 13.5 (7.75-<br>19.25)   | 45.3 |
| Time vacc to<br>positive test<br>for Alpha &<br>Delta<br>patients<br>vaccinated<br>after Delta<br>outbreak,<br>median<br>(IQR) | days                           | 66.5 (44.25-<br>88.75)  | 45.5 (27.25-<br>60.5)   | NA                         | 2 (2-2)            | 2 (2-2)                 | 82.2 |
| PCR ct<br>value,<br>median<br>(IQR)                                                                                            |                                | 28.8 (28.35-<br>31.31)  | 20.27 (17.67-<br>25.7)  | 25.03<br>(23.38-<br>26.68) | NA                 | 23.21 (23.21-<br>23.21) | 60.2 |
| Hospitalisati<br>on                                                                                                            | No<br>Yes                      | 24 (92.3%)<br>2 (7.7%)  | 447 (99.8%)<br>1 (0.2%) | 1 (14.3%)<br>6 (85.7%)     | 2 (40%)<br>3 (60%) | 0 (0%)<br>2 (100%)      | 0    |
| Source of<br>infection                                                                                                         | Club, party, bar               | 1 (3.8%)                | 16 (3.6%)               | 0 (0%)                     | 0 (0%)             | 0 (0%)                  | 0    |
|                                                                                                                                | Cultural event                 | 0 (0%)                  | 7 (1.6%)                | 0 (0%)                     | 0 (0%)             | 0 (0%)                  |      |
|                                                                                                                                | Family                         | 5 (19.2%)               | 125 (27.9%)             | 4 (57.1%)                  | 0 (0%)             | 0 (0%)                  |      |
|                                                                                                                                | Friends                        | 1 (3.8%)                | 24 (5.4%)               | 0 (0%)                     | 0 (0%)             | 0 (0%)                  |      |
|                                                                                                                                | Holidays                       | 4 (15.4%)               | 101 (22.5%)             | 0 (0%)                     | 0 (0%)             | 0 (0%)                  |      |
|                                                                                                                                | Hospital                       | 0 (0%)                  | 7 (1.6%)                | 0 (0%)                     | 0 (0%)             | 0 (0%)                  |      |
|                                                                                                                                | Religion                       | 0 (0%)                  | 3 (0.7%)                | 0 (0%)                     | 0 (0%)             | 0 (0%)                  |      |
|                                                                                                                                | Retirement and<br>nursing home | 8 (30.8%)               | 11 (2.5%)               | 1 (14.3%)                  | 2 (40%)            | 1 (50%)                 |      |
|                                                                                                                                | School                         | 0 (0%)                  | 9 (2%)                  | 0 (0%)                     | 0 (0%)             | 0 (0%)                  |      |
|                                                                                                                                | Sports                         | 0 (0%)                  | 4 (0.9%)                | 0 (0%)                     | 0 (0%)             | 0 (0%)                  |      |
|                                                                                                                                | Unknown                        | 7 (26.9%)               | 105 (23.4%)             | 2 (28.6%)                  | 3 (60%)            | 1 (50%)                 |      |
|                                                                                                                                | Work                           | 0 (0%)                  | 36 (8%)                 | 0 (0%)                     | 0 (0%)             | 0 (0%)                  |      |
| Baseline risk<br>factor                                                                                                        |                                |                         |                         |                            |                    |                         |      |

|                       |     |            |             |           |          |          |   |
|-----------------------|-----|------------|-------------|-----------|----------|----------|---|
| Chronic lung disease  | No  | 20 (76.9%) | 422 (94.2%) | 6 (85.7%) | 4 (80%)  | 2 (100%) | 0 |
|                       | Yes | 6 (23.1%)  | 26 (5.8%)   | 1 (14.3%) | 1 (20%)  | 0 (0%)   |   |
| Chronic renal disease | No  | 26 (100%)  | 443 (98.9%) | 5 (71.4%) | 5 (100%) | 1 (50%)  | 0 |
|                       | Yes | 0 (0%)     | 5 (1.1%)    | 2 (28.6%) | 0 (0%)   | 1 (50%)  |   |
| Cancer                | No  | 25 (96.2%) | 436 (97.3%) | 6 (85.7%) | 4 (80%)  | 2 (100%) | 0 |
|                       | Yes | 1 (3.8%)   | 12 (2.7%)   | 1 (14.3%) | 1 (20%)  | 0 (0%)   |   |
| Cardiac disease       | No  | 23 (88.5%) | 422 (94.2%) | 2 (28.6%) | 1 (20%)  | 0 (0%)   | 0 |
|                       | Yes | 3 (11.5%)  | 26 (5.8%)   | 5 (71.4%) | 4 (80%)  | 2 (100%) |   |
| Arterial hypertension | No  | 22 (84.6%) | 384 (85.9%) | 4 (57.1%) | 3 (60%)  | 0 (0%)   | 0 |
|                       | Yes | 4 (15.4%)  | 63 (14.1%)  | 3 (42.9%) | 2 (40%)  | 2 (100%) |   |
| Diabetes              | No  | 25 (96.2%) | 422 (92%)   | 4 (57.1%) | 4 (80%)  | 2 (100%) | 0 |
|                       | Yes | 1 (3.8%)   | 36 (8%)     | 3 (42.9%) | 1 (20%)  | 0 (0%)   |   |
| Obesity               | No  | 26 (100%)  | 446 (99.6%) | 6 (85.7%) | 5 (100%) | 2 (100%) | 0 |
|                       | Yes | 0 (0%)     | 2 (0.4%)    | 1 (14.3%) | 0 (0%)   | 0 (0%)   |   |

**Table S5.** Chronic diseases and conditions leading to an especially high risk for severe course of disease according to the Federal Office of Public Health. According to the FOPH, only adults are considered to be at high risk. Therefore, the following criteria refer only to adults.

| Condition              | Specific disease                            | Details                                                         |
|------------------------|---------------------------------------------|-----------------------------------------------------------------|
| Adults with Trisomy 21 |                                             |                                                                 |
| Hypertension           | Arterial hypertension with end-organ damage |                                                                 |
|                        | Therapy-resistant arterial hypertension     |                                                                 |
| Cardiovascular disease | General                                     | NYHA II-IV and NT-proBNP > 125 pg/ml                            |
|                        |                                             | 2 cardio-vascular risk factors                                  |
|                        |                                             | Prior stroke and/or symptomatic vasculopathy                    |
|                        | Coronary heart disease                      | Chronic renal insufficiency (Stage 3, GFR <60 ml/min)           |
|                        |                                             | Myocardial infarction in the past 12 months                     |
|                        |                                             | Symptomatic chronic coronary syndrome despite medical treatment |

|                                           |                                                                          |                                                                                                                                            |
|-------------------------------------------|--------------------------------------------------------------------------|--------------------------------------------------------------------------------------------------------------------------------------------|
|                                           | Disease of the heart valves                                              | Moderate or serious stenosis and/or regurgitation in addition to meeting at least one general criterion                                    |
|                                           |                                                                          | Any surgical or percutaneous valve replacement in addition to meeting at least one general criterion                                       |
|                                           | Cardiac insufficiency                                                    | Patients with dyspnea of functional class NYHA II–IV or NT-proBNP > 125pg/ml despite medical treatment for any LVEF (HFpEF, HFmrEF, HFrEF) |
|                                           |                                                                          | Cardiomyopathy with any cause                                                                                                              |
|                                           |                                                                          | Pulmonary arterial hypertension                                                                                                            |
|                                           | Arrhythmia                                                               | Auricular fibrillation with a CHA2DS2-VASc score of at least 2 points                                                                      |
|                                           |                                                                          | Prior implant of pacemaker (incl. ICD and/or CRT implantation) in addition to meeting one general criterion                                |
|                                           | Adults with congenital heart disease                                     | Congenital heart disease according to the individual assessment of the attending cardiologist                                              |
| Diabetes                                  | Diabetes mellitus, with long-term complications or a HbA1c of $\geq 8\%$ |                                                                                                                                            |
| Chronic pulmonary and respiratory disease | Chronic obstructive lung diseases GOLD Grade II–IV                       |                                                                                                                                            |
|                                           | Pulmonary emphysema                                                      |                                                                                                                                            |
|                                           | Uncontrolled asthma, in particular serious bronchial asthma              |                                                                                                                                            |
|                                           | Interstitial lung diseases / pulmonary fibrosis                          |                                                                                                                                            |
|                                           | Active lung cancer                                                       |                                                                                                                                            |
|                                           | Pulmonary arterial hypertension                                          |                                                                                                                                            |
|                                           | Pulmonary vascular disease                                               |                                                                                                                                            |
|                                           | Active Sarcoidosis                                                       |                                                                                                                                            |
|                                           | Cystic fibrosis                                                          |                                                                                                                                            |
|                                           | Chronic lung infections (atypical mycobacteriosis, bronchiectasis, etc.) |                                                                                                                                            |

|                                                  |                                                                                                                                                                                            |
|--------------------------------------------------|--------------------------------------------------------------------------------------------------------------------------------------------------------------------------------------------|
| Diseases/Therapies that weaken the immune system | Ventilated patients                                                                                                                                                                        |
|                                                  | Diseases with severely reduced lung capacity                                                                                                                                               |
|                                                  | Serious immunosuppression (e.g. HIV-infection with a CD4+ T cell number of < 200/ $\mu$ l)                                                                                                 |
|                                                  | Neutropenia (<1'000 neutrophils/ $\mu$ l) for $\geq$ 1 week                                                                                                                                |
|                                                  | Lymphocytopenia (<200 lymphocytes/ $\mu$ l)                                                                                                                                                |
|                                                  | Hereditary immunodeficiencies                                                                                                                                                              |
|                                                  | Use of medication that suppresses the immune defenses (such as long-term use of glucocorticoids (prednisolone equivalent > 20 mg/day), monoclonal antibodies, cytostatics, biologics etc.) |
|                                                  | Aggressive lymphomas (all entities)                                                                                                                                                        |
|                                                  | Acute lymphatic leukaemia                                                                                                                                                                  |
|                                                  | Acute myeloid leukaemia                                                                                                                                                                    |
|                                                  | Acute promyelocytic leukaemia                                                                                                                                                              |
|                                                  | T-cell prolymphocytic leukaemia                                                                                                                                                            |
|                                                  | Primary lymphomas of the central nervous system                                                                                                                                            |
|                                                  | Stem cell transplantation                                                                                                                                                                  |
|                                                  | Amyloidosis (light-chain (AL) amyloidosis)                                                                                                                                                 |
|                                                  | Chronic lymphatic leukaemia                                                                                                                                                                |
|                                                  | Multiple myeloma                                                                                                                                                                           |
|                                                  | Sickle-cell disease                                                                                                                                                                        |
|                                                  | Bone marrow transplant                                                                                                                                                                     |
|                                                  | Solid organ transplant                                                                                                                                                                     |
|                                                  | Individuals on a transplant waiting list                                                                                                                                                   |
| Cancer                                           | Cancer undergoing medical treatment                                                                                                                                                        |



|               |                                                                       |
|---------------|-----------------------------------------------------------------------|
| Obesity       | Patients with a body-mass index (BMI) of 35 kg/m <sup>2</sup> or more |
| Liver disease | Cirrhosis of the liver                                                |
| Renal disease | Chronic renal insufficiency with a GFR < 60 ml/min                    |

**Table S6.** Multivariable logistic regression exploring the relationships between potential risk factors and the probability to suffer from a SARS-CoV-2 breakthrough infection using the 'control' group 2. Confidence intervals and p-values are computed using Firth penalization, because the level "Yes" for "Acute fever" was rarely observed. Only Moderna and Pfizer/BioNTech vaccines are compared, because no other vaccine was used in the control population.

|                                                    | n      | Odds ratio | CI             | p      |
|----------------------------------------------------|--------|------------|----------------|--------|
| Intercept                                          | 107039 | 0.010      | (0.008-0.013)  | <0.001 |
| Age                                                |        | 0.982      | (0.977-0.987)  | <0.001 |
| Gender (woman vs. man)                             |        | 1.048      | (0.876-1.255)  | 0.606  |
| Vaccine (Pfizer/BioNTech, ref =Moderna)            |        | 1.530      | (1.342-1.743)  | <0.001 |
| Chronic disease (=Yes)                             |        | 1.990      | (1.590-2.482)  | <0.001 |
| Healthcare worker (=Yes)                           |        | 1.927      | (1.438-2.538)  | <0.001 |
| Close contact with high-risk person (=Yes)         |        | 0.934      | (0.752-1.153)  | 0.530  |
| Pregnant (=Yes)                                    |        | 1.265      | (0.144-4.581)  | 0.784  |
| Severe immunosuppression (=Yes)                    |        | 1.248      | (0.806-1.849)  | 0.307  |
| Serious side-effects from previous vaccines (=Yes) |        | 0.289      | (0.033-1.035)  | 0.058  |
| Acute fever (=Yes)                                 |        | 2.693      | (0.021-19.002) | 0.549  |
| Recovered from COVID-19 (=Yes)                     |        | 0.431      | (0.178-0.861)  | 0.014  |

**Table S7.** Multivariable logistic regression exploring the relationships between potential risk factors and the probability to suffer from a Delta variant caused breakthrough infection using the 'control' set 1 and 2. Only Moderna and Pfizer/BioNTech vaccines are compared, because no other vaccine was used in the control populations.

| Control set 1          |        |            |               |        | Control set 2 |            |               |        |
|------------------------|--------|------------|---------------|--------|---------------|------------|---------------|--------|
|                        | n      | Odds ratio | CI            | p      | n             | Odds ratio | CI            | p      |
| Intercept              | 125076 | 0.004      | (0.003-0.006) | <0.001 | 106807        | 0.006      | (0.004-0.009) | <0.001 |
| Age                    |        | 0.985      | (0.978-0.991) | <0.001 |               | 0.979      | (0.972-0.986) | <0.001 |
| Gender (woman vs. man) |        | 0.998      | (0.779-1.280) | 0.988  |               | 1.008      | (0.787-1.293) | 0.947  |

|                                            |       |               |        |       |               |        |
|--------------------------------------------|-------|---------------|--------|-------|---------------|--------|
| Vaccine (Pfizer/BioNTech, ref =Moderna)    | 1.473 | (1.232-1.759) | <0.001 | 1.551 | (1.296-1.856) | <0.001 |
| Chronic disease (=Yes)                     | 1.972 | (1.444-2.674) | <0.001 | 1.885 | (1.374-2.568) | <0.001 |
| Healthcare worker (=Yes)                   | 1.576 | (1.061-2.278) | 0.019  | 2.184 | (1.484-3.126) | <0.001 |
| Close contact with high-risk person (=Yes) | 0.918 | (0.677-1.231) | 0.575  | 0.957 | (0.708-1.278) | 0.768  |
| Pregnant (=Yes)                            | 1.247 | (0.071-5.614) | 0.826  | 2.331 | (0.264-8.516) | 0.367  |
| Recovered from COVID19 (=Yes)              | 0.18  | (0.030-0.561) | 0.016  | 0.301 | (0.063-0.851) | 0.020  |

**Table S8.** Multivariable generalized linear model with binomial distribution investigating the probability of suffering from a breakthrough infection caused by the Delta variant (as compared to the Alpha variant taken as the reference) as a function of individual characteristics. Confidence intervals and p-values are computed using Firth penalization due to rare or no observations in some factors' levels.

|                                            | n   | Odds ratio | CI                   | p      |
|--------------------------------------------|-----|------------|----------------------|--------|
| Intercept                                  | 268 | 8507.26    | (199.79, 8455840.37) | <0.001 |
| Age                                        |     | 0.93       | (0.85-0.98)          | 0.007  |
| Gender (woman vs. man)                     |     | 1.05       | (0.21-5.39)          | 0.951  |
| Vaccine Pfizer/BioNTech, (ref=Moderna)     |     | 0.24       | (0.03-0.90)          | 0.033  |
| Healthcare worker (=Yes)                   |     | 3.55       | (0.11-843.96)        | 0.516  |
| Close contact with high-risk person (=Yes) |     | 0.62       | (0.13-2.90)          | 0.534  |
| Severe immunosuppression (=Yes)            |     | 0.79       | 0.05-14.70           | 0.868  |
| Pregnant (=Yes)                            |     | 0.01       | (0.00-4.15)          | 0.116  |
| Chronic disease (=Yes)                     |     | 0.12       | 0.01-1.20            | 0.071  |
| Chronic lung disease (=Yes)                |     | 1.37       | 0.18-22.72           | 0.780  |
| Chronic renal disease (=Yes)               |     | 0.48       | 0.02-12.17           | 0.641  |
| Cancer (=Yes)                              |     | 0.33       | 0.01-5.07            | 0.430  |
| Cardiac disease (=Yes)                     |     | 0.69       | 0.10-5.12            | 0.706  |
| Arterial hypertension (=Yes)               |     | 6.93       | 1.26-57.33           | 0.025  |
| Diabetes (=Yes)                            |     | 3.09       | 0.43-35.82           | 0.278  |
| Obesity (=Yes)                             |     | 0.05       | (0.00-1.16)          | 0.061  |

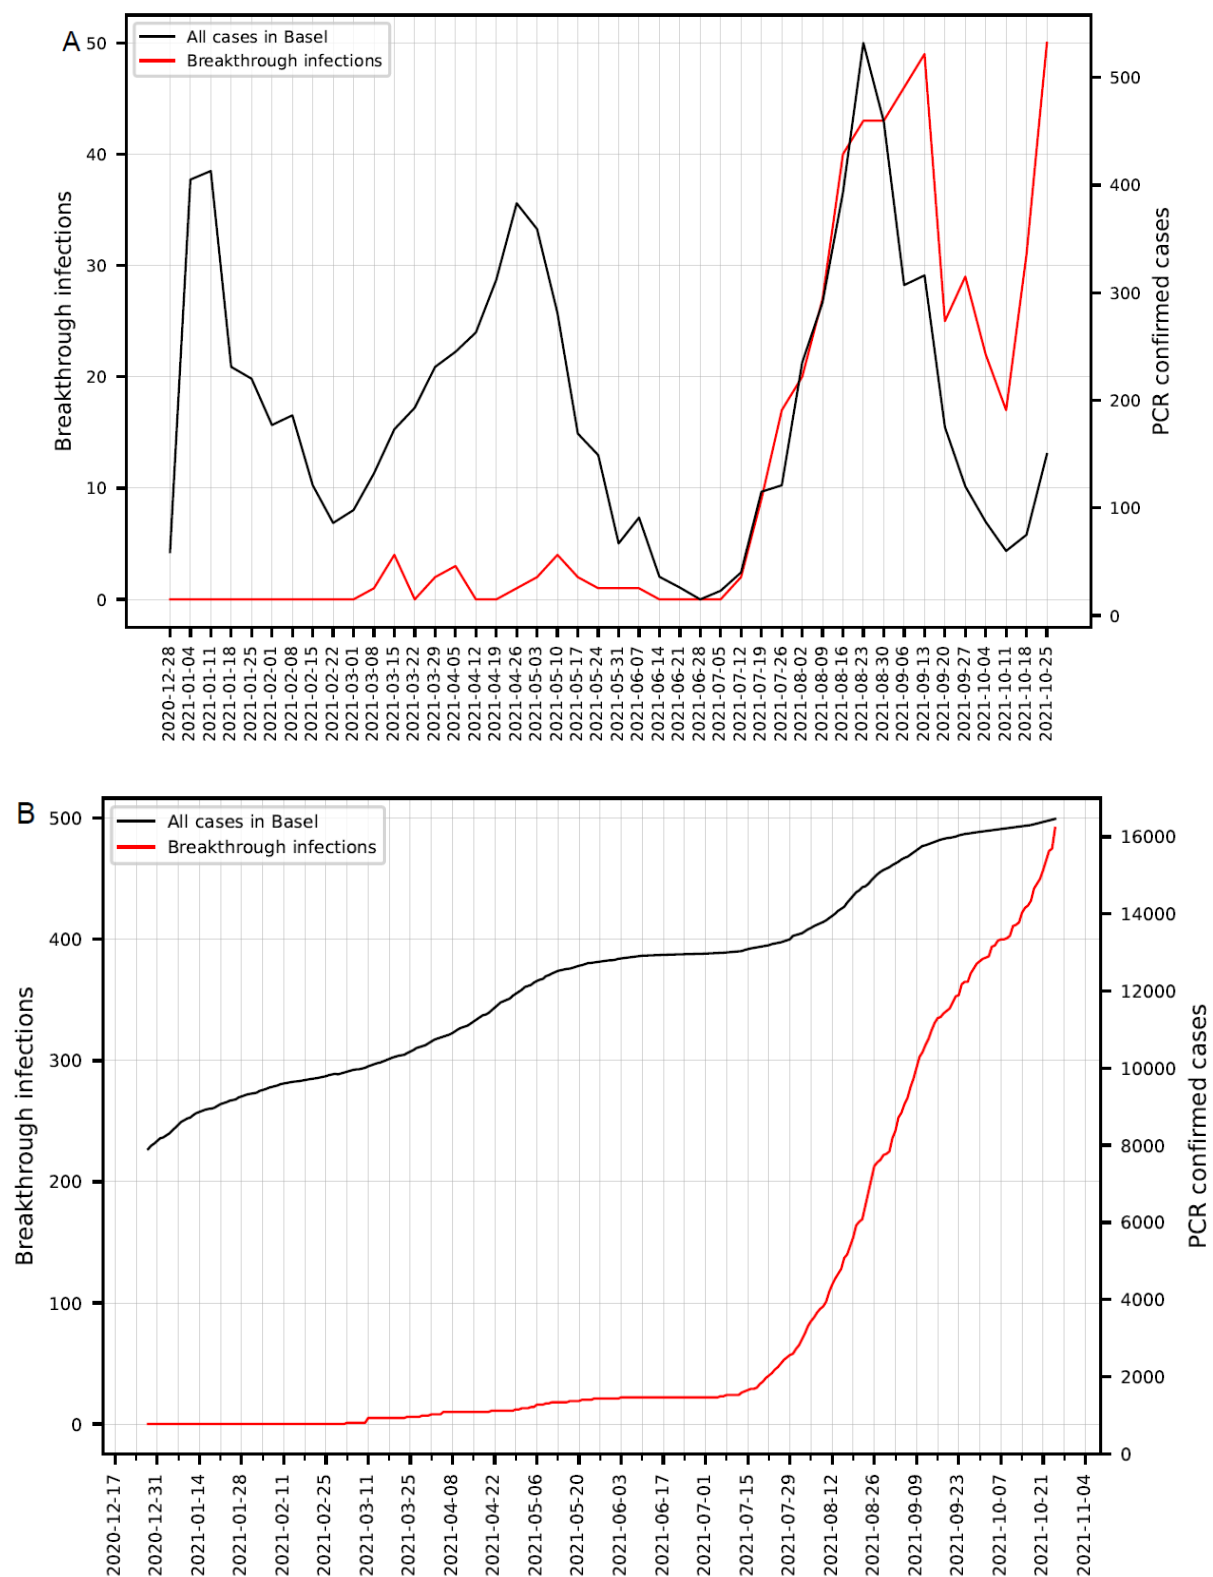

**Figure S1.** SARS-CoV-2 PCR confirmed cases after introduction of the vaccine. The red line shows all breakthrough infections and the black line shows all PCR confirmed cases (secondary axis) in Basel City

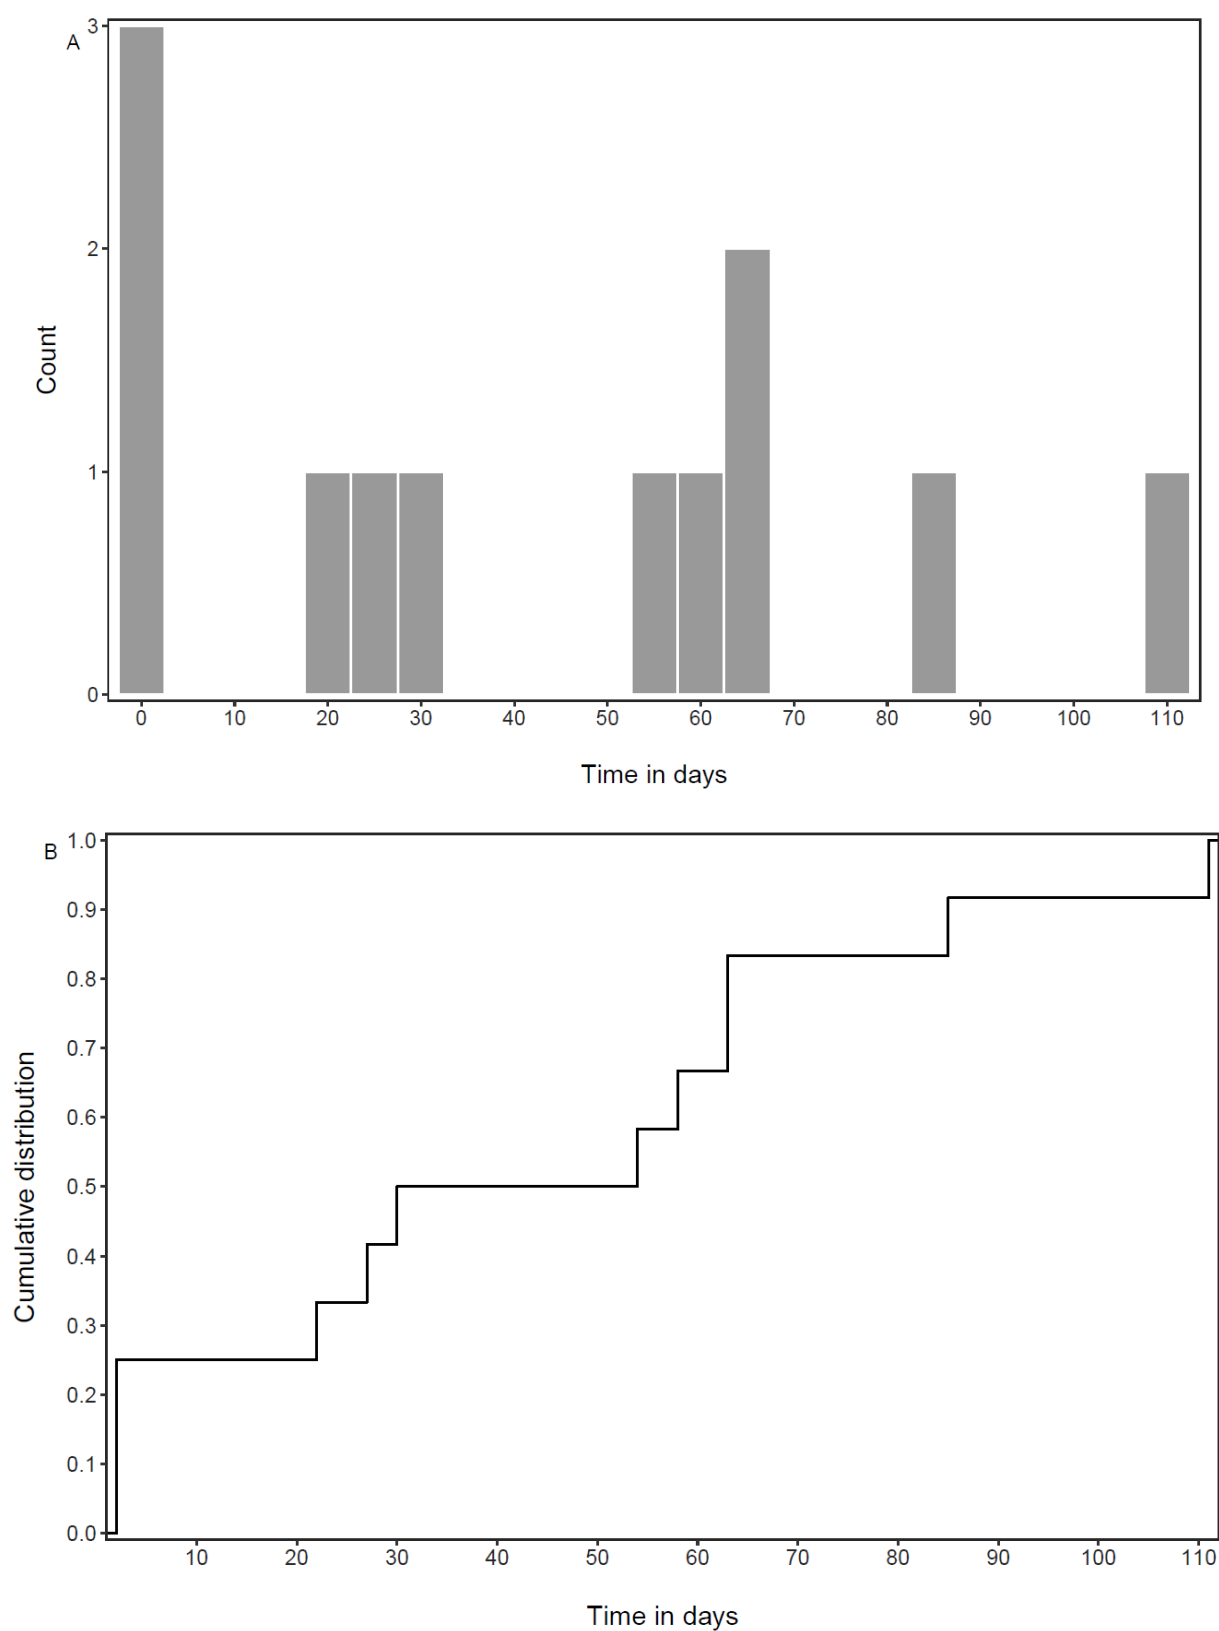

**Figure S2.** Distribution time in days from full vaccination (as defined) to the breakthrough infection with the Alpha variant. (A), absolute frequency; (B) cumulative frequency.

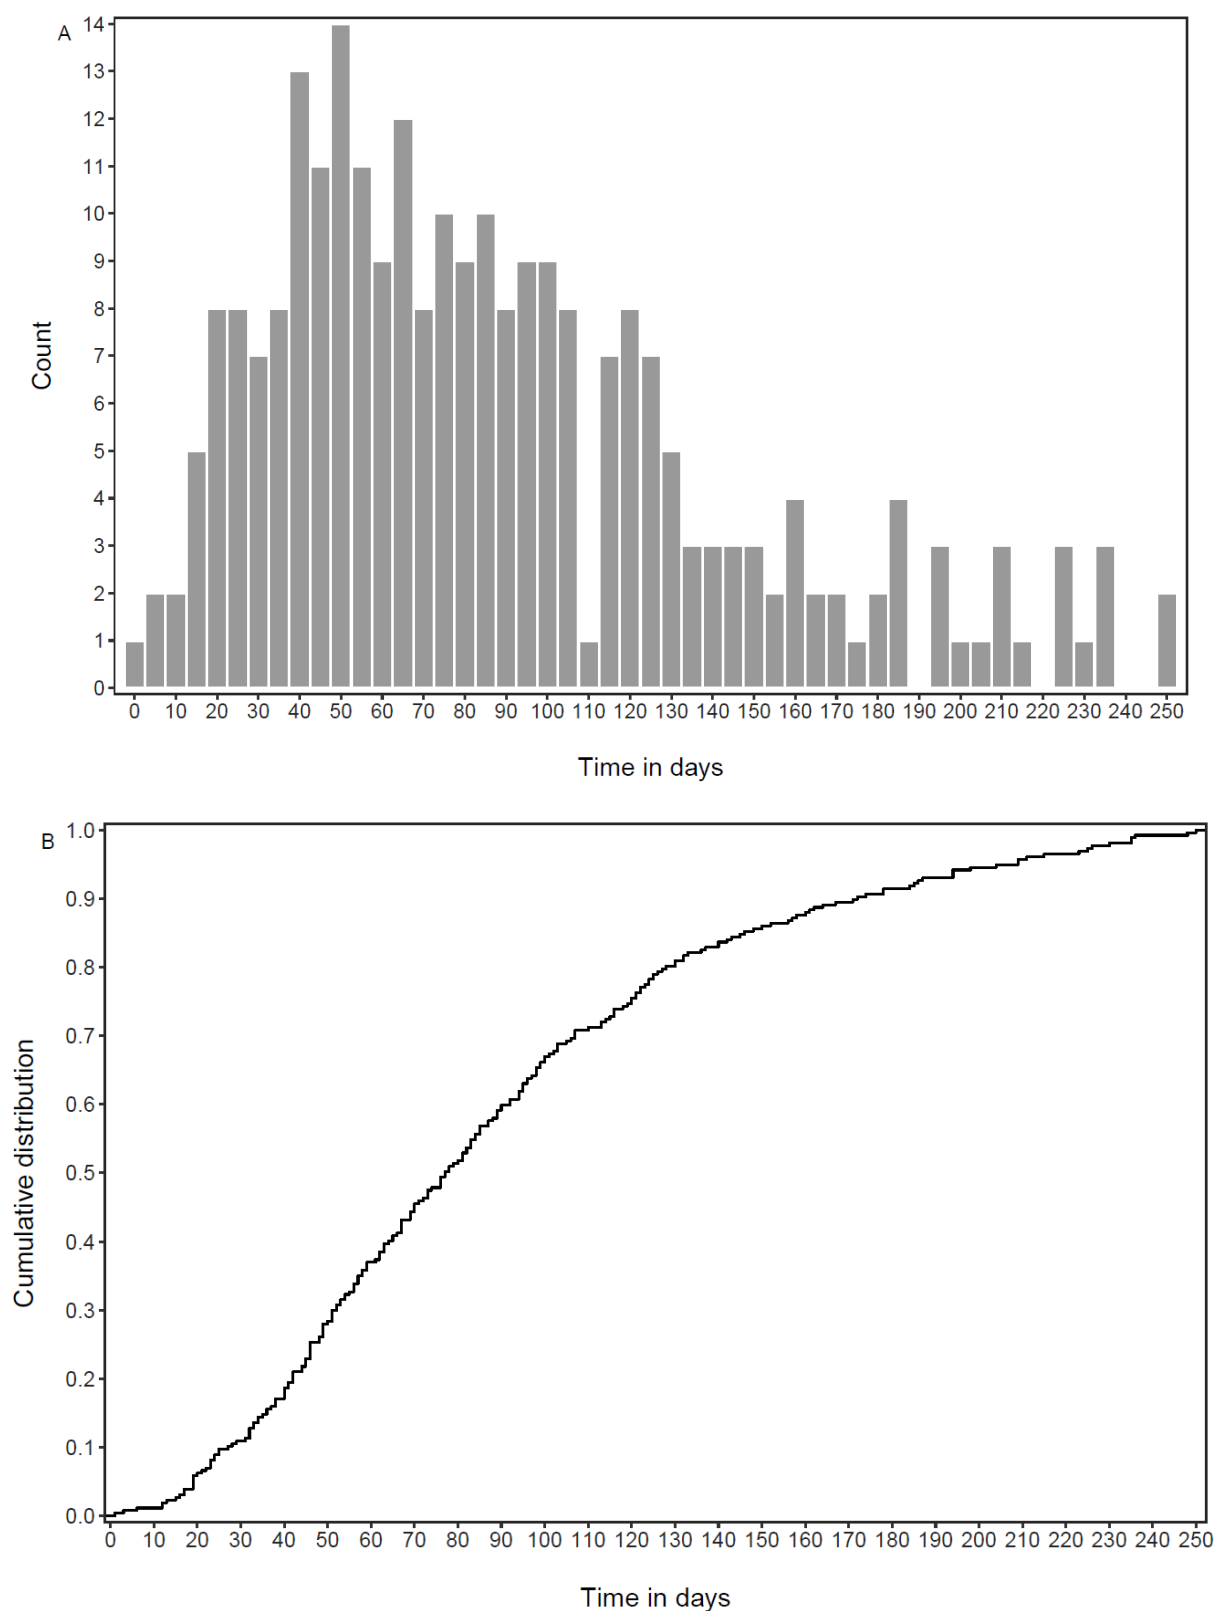

**Figure S3.** Distribution time in days from full vaccination (as defined) to the breakthrough infection with the Delta variant. (A), absolute frequency; (B) cumulative frequency.

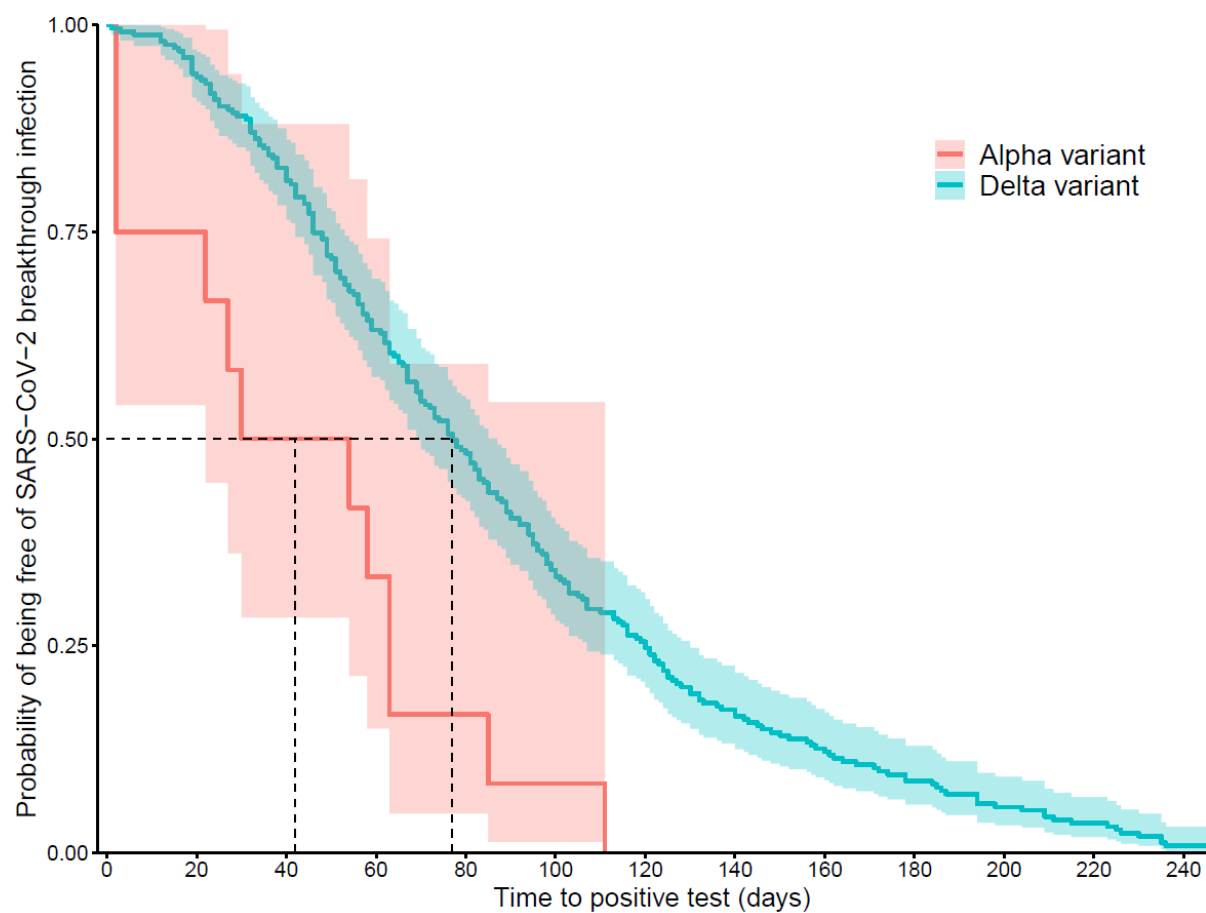

**Figure S4.** Kaplan-Meier curve representing the proportion of patients free of breakthrough infection in relation to the time elapsed between the vaccination and the positive test for the Alpha and the Delta variant.
